# Supplementary material for: Multiparametric whole-body 3.0-T MRI in newly diagnosed intermediate- and high-risk prostate cancer: diagnostic accuracy and interobserver agreement for nodal and metastatic staging
Source: PubMed Central journal article supplement (PMC6510859; doi:10.1007/s00330-018-5813-4), 2018-12-05

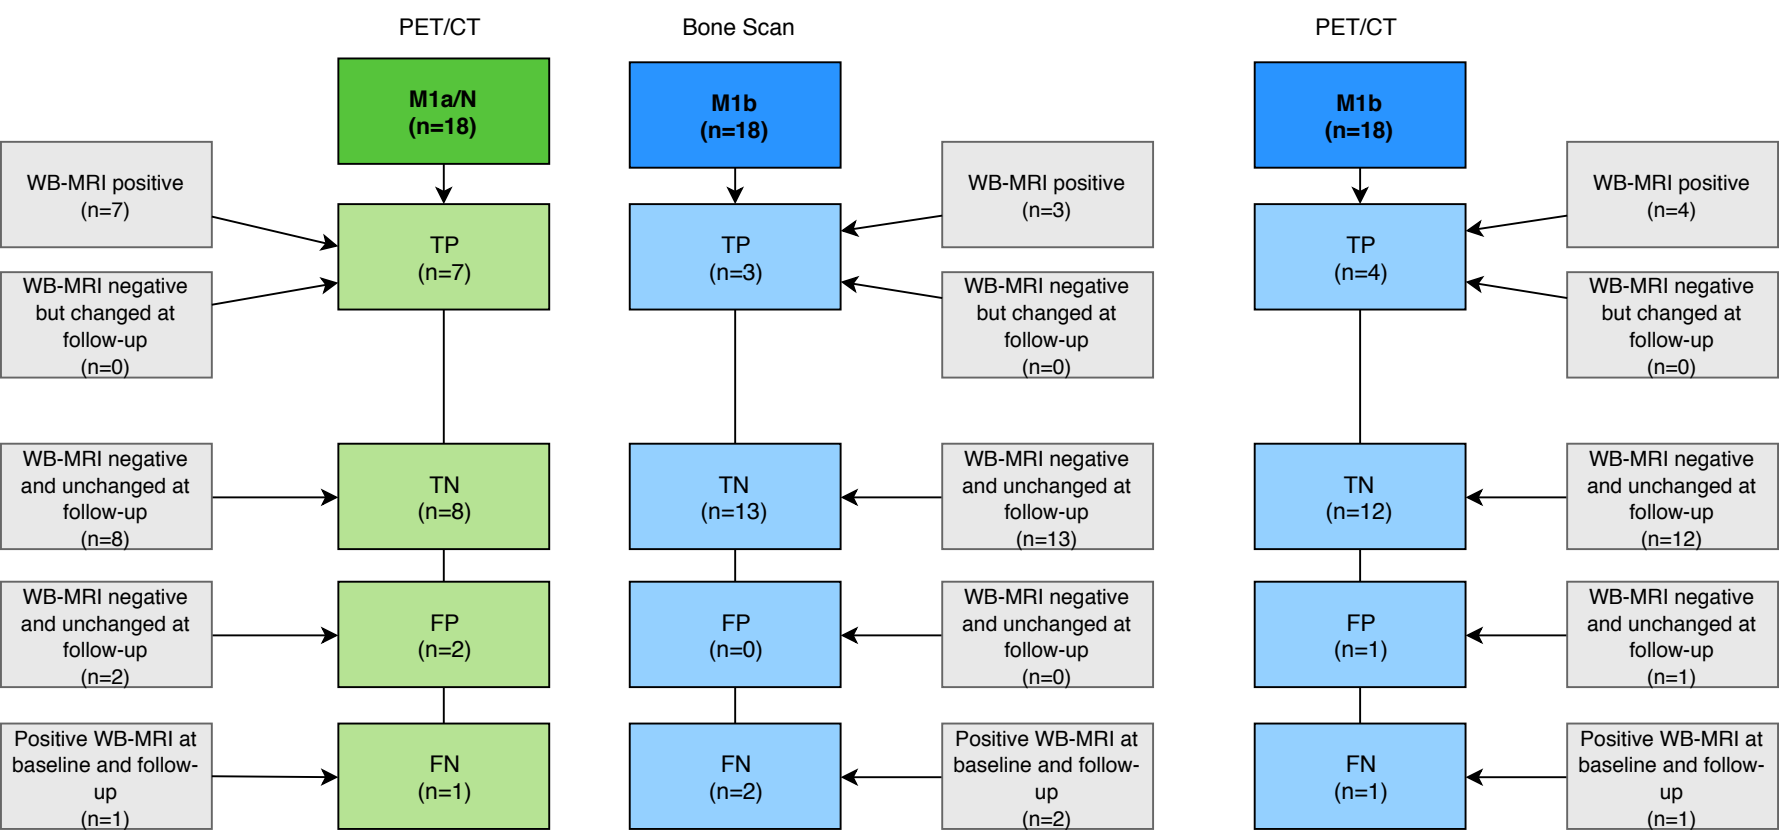

Supplement: 330_2018_5813_MOESM1_ESM.pdf [file 330_2018_5813_MOESM1_ESM.pdf]
